# Supplementary material for: Impact of adaptive intensity-modulated radiotherapy on the neutrophil-to-lymphocyte ratio in patients with nasopharyngeal carcinoma
Source: Radiat Oncol. 2019 Aug 22;14:151. doi: 10.1186/s13014-019-1350-9 (PMC6704552; doi:10.1186/s13014-019-1350-9)
Supplement: Supplementary file 1 — Patient characteristics and radiotherapy-related variables between the two groups. (XLSX 23 kb) [file 13014_2019_1350_MOESM1_ESM.xlsx]

## Sheet: ART
NUMBER	GROUP	pre-weight	after-体重	par	skin	oral	T	N	M	TNM	smoke	drink	family	year	f/m	os	NLR	WBC	LIN	NC	PLT
1	0	72	58	2	1	2	2	2	0	3	1	0	1	58	1	37.4	-1.5513	-1.1013	-0.9467	0.237	-0.039
2	0	75	66	2	1	2	2	2	0	3	0	0	0	16	1	37	0.3252	-0.7418	-3.5614	-0.0368	0.2075
3	0	70	70	2	1	3	3	0	0	3	0	0	0	64	1	34.1	0.3273	-0.0022	-0.5588	-1.3173	0.3679
4	0	77	76	1	2	3	3	1	0	3	1	0	0	42	1	36.7	0.3119	-0.0387	0.2809	-0.045	-0.1302
5	0	90	88	2	1	2	2	2	0	3	1	1	1	50	1	39.5	0.1932	-0.803	-0.9024	-1.3579	-0.4653
6	0	85	79	2	1	3	2	2	0	3	0	0	0	68	1	35	-1.476	-0.7947	-1.3636	0.0454	0.0297
7	0	84	78	2	1	2	2	1	0	3	0	0	0	44	1	18.7	0.1538	-0.351	-0.5756	-0.25	-0.1861
8	0	86	80	1	2	3	3	1	0	3	0	0	0	42	2	30.2	0.2412	0.1727	0.0714	-0.2237	0.2698
9	0	69	63	2	1	2	2	1	0	3	0	0	0	69	1	8.7	0.01	-0.7032	-0.2756	-0.2081	-0.0915
10	0	55	54	2	1	2	3	0	0	3	0	0	0	62	2	34.1	-0.2235	-0.2973	-0.7143	-0.0702	0.3679
11	0	59	55	2	2	3	3	2	0	3	0	0	0	53	2	29	0.503	-0.1496	-1.0563	-0.0215	0.2277
12	0	57	54	1	1	0	3	2	0	3	1	0	0	52	1	46	0.8744	0.1975	-2.5745	1.2265	0.0947
13	0	74	70.5	2	1	2	2	0	0	2	0	0	0	60	2	6	0.2412	0.1182	0.0714	-0.2237	-0.0256
14	0	54	50	2	3	3	2	2	0	3	0	0	0	58	1	23	0.1577	-0.6334	-0.913	-0.3794	-0.0782
15	0	54	49	2	1	2	2	2	0	3	0	0	0	58	1	32.5	0.6679	0.1384	-0.8333	0.6424	-0.299
16	0	78	76	1	0	0	1	3	0	4a	0	0	0	61	2	32	0.3682	-1.2471	-2.1786	-0.502	-0.1517
17	0	56	54	2	1	3	4	2	0	4a	0	0	0	60	1	31	-0.2394	-1.1942	-0.9024	-0.5759	-0.4107
18	0	51	49	2	1	2	2	3	0	3	0	0	1	64	2	34.9	0.0251	0.134	-0.1549	-0.1846	0.1312
19	0	55	48	2	1	2	2	2	0	3	0	0	0	44	1	29.5	0.1577	-0.9256	-2.4259	-0.3703	0.3679
20	0	66	61	2	1	2	2	2	0	3	0	0	0	48	1	32.5	0.6372	-0.7614	-2.1711	-0.1308	-0.3134
21	0	75	70	1	1	0	3	2	0	3	1	0	0	52	1	46	0.2986	-2.0755	-3.1176	-0.6538	0.2941
22	0	59	55	2	1	2	2	1	0	3	1	0	1	57	1	30.2	0.1418	-0.6529	-0.125	-0.3109	-0.2063
23	0	88	85	2	2	2	2	2	0	3	1	0	0	54	1	29.7	0.5327	0.2272	-1	0.0699	-0.3876
24	0	96	80	2	1	2	2	1	0	3	1	1	0	47	1	29.5	0.8283	0.3663	-1.6267	1.2176	-0.2672
25	0	81	75	1	1	0	3	2	0	3	1	1	1	67	1	34.4	-0.5923	-0.2088	-0.5077	0.0532	0.1007
26	0	76	73	2	1	2	2	0	0	2	0	0	0	48	2	18.6	0.6562	-0.2795	-1.8923	0.0057	0.2606
27	0	53	49	2	2	2	2	2	0	3	0	0	0	55	2	37.9	0.8141	0.1579	-1.9574	0.8187	0.2813
28	0	57	56	2	1	2	2	1	0	3	0	0	0	57	1	43.9	0.7892	-0.0366	-1.8382	0.6713	-0.3626
29	0	69	66	1	2	3	3	1	0	3	1	1	0	52	1	29	0.7416	-0.4596	-3.6316	-0.1644	-0.1182
30	0	73	70	2	2	3	2	2	0	3	1	0	0	35	1	35.8	0.3199	0.1363	-0.0919	0.3467	-0.0176
31	0	76	73	2	1	2	3	0	0	3	0	0	0	49	1	7.1	-0.8813	-0.781	-1.8298	-0.5041	-0.1991
32	0	49	45	2	1	2	2	2	0	3	0	0	0	61	2	40.2	0.3763	-1.0605	0.3699	-0.0102	-0.1674
33	0	68	63	1	0	0	4	0	0	4a	0	0	0	55	2	18.7	-4.9472	-0.5309	0.6011	-0.5784	-0.083
34	0	63	61.5	2	1	2	2	2	0	3	0	0	0	53	2	30	-1.8955	-0.1411	-1.5614	0.1154	-0.0096
35	0	53	51	2	1	2	2	1	0	3	0	0	0	53	2	46.8	0.6179	0.0368	-1.1096	0.2405	-0.0883
36	0	62	60	1	2	3	3	1	0	3	0	0	0	66	1	46	0.062	-0.5943	-0.4306	-0.5251	-0.0245
37	0	67	65	1	2	3	4	1	0	4a	1	0	0	64	2	43	0.5272	-0.745	-2.4324	-0.3839	-0.4795
38	0	66	64	1	1	0	3	2	0	3	1	0	0	44	1	27.1	0.6663	-0.3524	-2.4419	-0.1293	0.0369
39	0	68	65	1	1	0	3	2	0	3	1	0	1	46	1	46.7	0.7401	-0.2526	-5.76	-0.4309	-0.0127
40	0	73	68	2	1	2	2	3	0	3	1	0	1	72	1	34.9	0.1144	-0.4845	-0.697	-0.3346	0.0329
41	0	60	60	1	1	0	3	2	0	3	0	0	1	19	2	32	0.3427	-0.5505	-1.5625	-0.4063	-0.2996
42	0	65	63	2	1	2	2	2	0	3	1	1	0	53	1	46.1	0.5285	0.1075	-0.2299	0.7244	-0.1593
43	0	48	48	2	1	2	2	2	0	3	1	0	0	55	1	25	-0.0063	-1.3939	-1.2784	-0.5638	-0.2473
44	0	66	65	2	1	2	2	2	0	3	0	0	0	60	1	29.1	0.5298	-0.6765	-2.2615	-0.348	0.0717
45	0	53	50	2	1	3	4	2	0	4a	0	0	1	29	2	31	-4.6856	-1.5057	0.2353	-0.77	-0.2216
46	0	70	68	2	1	2	2	0	0	2	1	1	0	42	1	10.6	0.2356	-0.2586	-0.4944	-0.1246	-0.0974
47	0	63	55	2	1	3	4	3	0	4b	0	1	0	61	1	33.5	-0.2205	0.3351	0.1667	-0.0168	0.3611
48	0	73	72	2	1	2	2	1	0	3	1	1	1	55	2	33.5	0.4542	-0.5185	-1.8158	-0.3493	0.022
49	0	60	60	2	1	2	2	3	0	3	0	0	0	52	2	33.7	-0.2612	0.224	-1.54	-1.014	0.2143
50	0	75	70	2	1	3	4	1	0	4a	1	0	0	49	1	34	0.5692	-0.2523	-1.6212	-0.1144	-0.3636

## Sheet: IMRT
NUMBER	GROUP	pre-weight	after-weight	par	skin	oral	T	N	M	smoke	drink	family	year	f/m	time	NLR	WBC	LIN	NC	PLT
69	1	66	61	2	1	2	2	2	0	0	0	0	64	1	32.5	0.8155	0.1567	-3.4048	0.1871	-0.0154
88	1	65	62	2	2	3	3	2	0	0	0	0	54	1	40.2	0.8196	0.5147	-3.1613	-0.8055	-0.1674
95	1	80	70	2	1	3	4	2	0	0	0	0	72	2	19	0.6729	0.6254	-3.9888	-0.632	-0.1591
70	1	70	66	2	1	2	2	2	0	0	0	0	59	1	37	0.7196	0.233	-1.3523	0	-0.0302
87	1	65	55	2	3	3	4	1	0	1	1	1	56	1	29.7	0.8155	0.1567	0.4178	-1.6873	-0.0154
52	1	57	50	2	2	1	2	2	0	1	1	0	61	1	23	0.8196	0.2722	-4.2619	-0.316	-0.1907
81	1	68	62	2	1	3	3	0	0	0	0	0	52	1	18.5	0.6889	0.4035	-3.9302	-0.5337	0.0973
82	1	58	52	2	1	2	2	2	0	0	0	0	52	1	33.5	0.7196	0.0909	-2.4048	0.0452	0.0797
89	1	70	65	2	2	3	3	2	0	1	1	0	64	1	43.9	0.9146	0.0353	-5.6552	0.4017	-0.3626
79	1	86	79	2	3	3	3	1	0	0	0	0	60	1	40.3	0.8561	-0.2331	-1.6316	0.3676	-0.04
72	1	81	77	2	2	1	2	1	0	1	1	0	48	1	28.2	0.8426	0.3446	-4.7381	0.097	-0.1014
56	1	64	61	2	2	1	2	2	0	0	0	0	55	1	41.8	0.633	0.4808	-3.6552	-0.7083	-0.1529
99	1	63	57	2	2	3	2	3	0	1	1	0	35	1	7	0.9146	-0.3919	-5.2	0.4704	-0.3093
67	1	75	74	2	1	3	4	2	0	1	1	1	53	1	29.7	0.8745	0.4005	-9.8571	-0.3624	-0.3219
66	1	65	64	2	1	1	1	3	0	1	1	0	57	1	27.4	0.8196	0.673	-15.0714	-1.9	-1.7833
54	1	53	48	2	2	3	3	1	0	1	1	0	49	1	27.4	-2.3037	0.641	-0.3067	-3.3168	-0.1489
71	1	66	61	2	2	3	3	2	0	0	0	0	61	2	22	-0.3128	0.4231	-0.8387	-1.4138	0.09
90	1	66	58	2	2	3	2	3	0	0	0	0	57	2	7.9	0.8657	0.3121	-6	0.0596	-0.2642
62	1	67	61	2	2	3	3	2	0	1	1	1	42	2	27.7	0.8174	0.14	-1.6353	-0.0931	-0.3333
86	1	65	61	2	3	3	3	1	0	0	0	0	60	1	40.7	0.8196	0.4279	-1.1111	-1.004	0.3127
58	1	72	67	2	3	3	3	1	0	0	0	0	39	1	27.1	0.9101	0.2966	-0.4211	-0.1123	-0.1934
64	1	75	70	2	2	3	2	2	0	0	0	0	50	1	43	0.6617	0.4212	-0.9211	-0.8967	-0.0396
63	1	58	56	2	1	2	2	0	0	0	0	0	38	2	35	0.8174	0.5844	-2.0976	-0.405	-0.0741
75	1	76	70	2	2	3	3	2	0	1	1	1	57	1	43	0.6617	0.2062	-0.0114	-1.0333	-0.0298
65	1	70	66	2	2	1	2	2	0	1	1	0	58	1	32.5	0.9101	-0.2028	-3.05	0.4171	-0.4577
92	1	72	67	2	1	2	2	2	0	0	0	1	52	1	30.3	0.6617	-0.625	-1.625	-3.8889	-0.3455
91	1	80	75	2	2	3	3	2	0	1	1	1	36	1	30.3	0.969	-0.0458	-1.6458	0.1048	-0.0543
68	1	66	58	2	2	2	2	3	0	1	1	1	73	1	36.9	0.6617	0.2987	-6.6429	-0.0281	0.0414
100	1	74	64	2	1	3	4	1	0	0	0	0	54	2	37.4	0.8655	0.6034	-2.2364	-1.5083	-0.7026
77	1	70	66	2	2	3	2	2	0	0	0	0	64	1	27.4	0.8174	-0.056	-2.1343	-0.4614	-0.2967
51	1	65	60	2	2	1	2	2	0	1	1	1	28	1	34.9	0.6159	0.0539	-1.5217	0.0313	-0.3037
61	1	65	60	2	3	3	3	2	0	0	0	0	55	2	40.3	0.7829	0.3229	-2.5682	-0.2817	-0.3121
80	1	76	71	2	3	3	2	2	0	1	1	0	51	1	40.3	0.8174	-0.2331	-0.4706	0.3676	-0.2133
76	1	75	69	2	1	2	2	0	0	1	1	0	45	1	44.6	0.8686	0.015	-4.32	0.3009	-0.0157
85	1	70	65	2	2	1	2	1	0	0	0	0	49	1	45.4	0.6408	0.2045	-4.1379	0.0617	-0.0298
94	1	77	73	2	1	2	2	2	0	1	1	0	60	1	45.4	0.9101	0.6034	-2.6216	1.0211	-0.7026
53	1	76	70	2	1	2	3	0	0	0	0	0	49	1	18.5	0.9362	0.1614	-0.7097	-0.0641	0.2093
60	1	70	66	2	1	3	3	0	0	1	1	1	67	1	36	0.9101	0.0261	-11.0769	0.2301	0.363
55	1	60	58	2	2	1	2	2	0	0	0	0	22	1	29.7	0.7616	-0.0298	-2.4706	0.1727	-0.2297
83	1	70	66	2	1	1	4	0	0	0	0	0	67	1	33.8	0.8989	0.3322	-7.6875	0.1214	-0.3265
74	1	71	68	2	2	1	2	1	0	1	1	0	49	1	34	0.9101	-0.0923	-0.1856	0.1307	0.2756
93	1	73	65	2	1	2	2	2	0	0	0	0	51	1	29.7	0.7829	0.2431	-3.7179	-0.0244	-0.1644
78	1	68	66	2	2	1	2	1	0	0	0	0	45	1	30	0.8196	-0.056	-0.7561	0.1134	-0.2967
57	1	71	67	2	2	1	2	1	0	1	1	0	60	1	28	0.969	-0.625	-11.4118	0.6153	-0.3455
97	1	67	64	2	2	3	4	3	0	0	0	0	61	2	36.7	0.9362	0	-1.5385	0.1773	-0.1043
96	1	70	68	2	1	2	2	0	0	0	0	0	42	1	32	0.5461	0.5844	-5.7727	0.0745	-0.0741
98	1	67	62	2	2	1	2	1	0	0	0	0	45	1	2	-0.2262	-0.0371	0.1727	-0.0144	0.1854
84	1	74	68	2	1	2	2	2	0	1	1	1	57	1	10.3	0.8655	0.2987	-6.7647	0.0704	0.0414
73	1	76	69	2	2	3	2	2	0	1	1	0	60	1	37.7	0.8196	-0.1426	-0.5503	0.2828	0.1036
59	1	60	54	2	2	1	2	1	0	0	0	0	57	1	21.4	0.8566	0.0279	-4	0.2829	-0.4036
